# Supplementary material for: Effect of the Morphology and Electrical Property of Metal-Deposited ZnO Nanostructures on CO Gas Sensitivity
Source: MDPI journal article supplement (doi:10.3390/nano10112124), 2020-10-27
Supplement: s1 [file s1]

## Supporting information

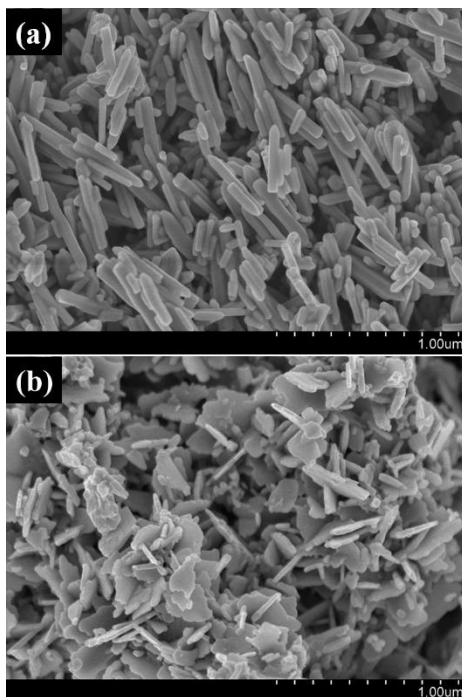

**Figure S1.** SEM image of ZnO nanostructures (a) ZnO nanorod (b) ZnO nanoplate

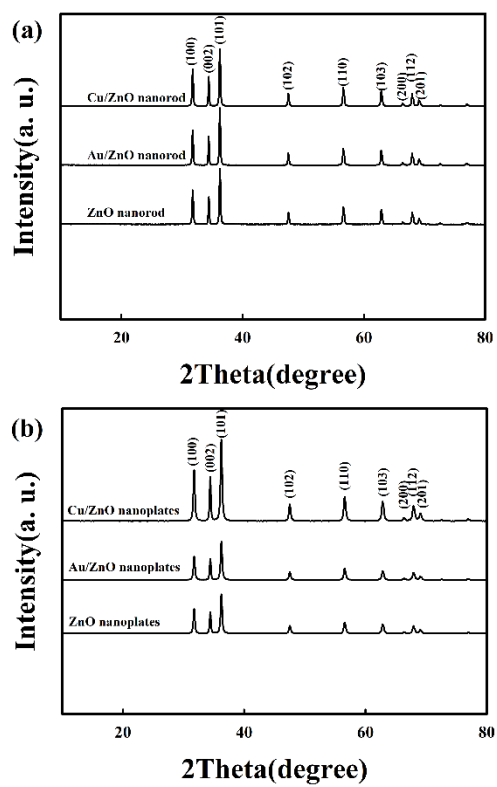

Figure S2. XRD patterns of the samples
